# Supplementary material for: Why [CpW(CO)3]+ reduces H2 to dihydride
Source: Royal Society of Chemistry journal article supplement (doi:10.1039/b301245j), 2003-01-01
Supplement: b301245j.doc [file b301245j.doc]

**Supplementary** **data**

Why [CpW(CO)3]+ reduces H2 to dihydride

Hervé Lesnard,*a,b* Isabelle Demachy,*a* Yves Jean**a,c* and Agusti Lledos**b*

a Laboratoire de Chimie Physique, UMR 8000, Université Paris Sud 11,Centre d’Orsay, 91 405 Orsay Cedex, France. Fax: (+33) 1 69154447; Tel: (+33) 1 69156171; E-mail: jean@lcp.u-psud.fr

b Departament de Quimica, Universitat Autonoma de Barcelona, 08193 Bellaterra, Barcelona, Spain. Fax: (+34) 93 5812920; Tel: (+34) 93 5811716; E-mail: [agusti@klingon.uab.es](mailto:agusti@klingon.uab.es)

c Laboratoire Hétéroéléments et Coordination, UMR CNRS 7653, Ecole Polytechnique, 91 128 Palaiseau Cedex, France.

-Ref Gaussian: M. J. Frisch, G. W. Trucks, H. B. Schlegel, G. E. Scuseria, M. A. Robb, J. R. Cheeseman, V. G. Zakrzewski, J. A. Montgomery, R. E. Stratmann, J. C. Burant, S. Dapprich, J. M. Millam, A. D. Daniels, K. N. Kudin, M. C. Strain, O. Farkas, J. Tomasi, V. Barone, M. Cossi, R. Cammi, B. Mennucci, C. Pomelli, C. Adamo, S. Clifford, J. Ochterski, G. A. Petersson, P. Y. Ayala, Q. Cui, K. Morokuma, D. K. Malick, A. D. Rabuck, K. Raghavachari, J. B. Foresman, J. Cioslowski, J. V. Ortiz, B. B. Stefanov, G. Liu, A. Liashenko, P. Piskorz, I. Komaromi, R. Gomperts, R. L. Martin, D. J. Fox, T. Keith, M. A. Al-Laham, C. Y. Peng, A. Nanayakkara, C. Gonzalez, M. Challacombe, P. M. W. Gill, B. Johnson, W. Chen, M. W. Wong, J. L. Andres, C. Gonzalez, M. Head-Gordon, E. S. Replogle, J. A. Pople, *Gaussian98 (Revission A.7)*; Gaussian Inc.: Pittsburgh, PA, 1998.

-Ref. B3LYP (*a*) A. D. Becke, *J. Chem. Phys.* 1993, **98**, 5648. (*b*) C. Lee, W. Yang, R. G. Parr, *Phys. Rev. B* 1988, **37**, 785.

-Ref. LANL2DZ (pseudos) (*a*) P. J. Hay, W. R. Wadt, *J. Chem. Phys.* 1985, **82**, 299. (*b*) P. J. Hay, W. R. Wadt, *J. Chem. Phys.* 1985, **82**, 270.

-Ref d polarization functions for P: A. Höllwarth, M. Böhme, S. Dapprich, A. W. Ehlers, A. Gobbi, V. Jonas, K. F. Köhler, R. Stegman, A. Veldkamp, G. Frenking, *Chem. Phys. Lett.* 1993, **208**, 237.

-Ref. basis set: (a) W. J. Hehre, R. Ditchfield, J. A. Pople, *J. Phys. Chem.* 1972, **56**, 2257. (b) P. C. Hariharan, J. A. Pople, *Theor. Chim. Acta* 1973, **28**, 213. (c) M. M. Francl, W. J. Pietro, W. J. Hehre, J. S. Binkley, M. S. Gordon, D. J. DeFrees, J. A. Pople, *J. Chem. Phys.* 1982, **77**, 3654.

-Ref. CCSD(T): (a) R. J. Bartlett, *J. Phys. Chem.* 1989, ***9*3**, 1697. (b) R. J. Bartlett, J. D. Watts, S. A. Kucharski, J. Noga, *Chem. Phys. Lett.* 1990, **165**, 513.
